# Supplementary material
Source: MDPI journal article supplement (https://www.mdpi.com/2075-163X/8/4/130)
Supplement: s1 [file s1]

# Supplementary Materials: Understanding Cationic Polymer Adsorption on Mineral Surfaces: Kaolinite in Cement Aggregates

Alain Jacquet <sup>1</sup>, Dawn L. Geatches <sup>2,\*</sup>, Stewart J. Clark <sup>2</sup> and H. Christopher Greenwell <sup>3,\*</sup>

**Table S1.** Electronic structure of the norm-conserving pseudopotentials (GGA-PBE where available).

| Element | Configuration |
|---------|---------------|
| Al      | $3s^23p^1$    |
| C       | $2s^22p^2$    |
| H       | $1s^1$        |
| N       | $2s^22p^3$    |
| O       | $2s^22p^4$    |
| Si      | $3s^23p^2$    |
| Cl      | $3s^23p^5$    |

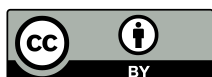

© 2018 by the authors. Submitted for possible open access publication under the terms and conditions of the Creative Commons Attribution (CC BY) license (<http://creativecommons.org/licenses/by/4.0/>).
